# Supplementary figures and images for: The Preparation and Biological Testing of Novel Wound Dressings with an Encapsulated Antibacterial and Antioxidant Substance
Source: MDPI journal article supplement (doi:10.3390/nano12213824), 2022-10-29

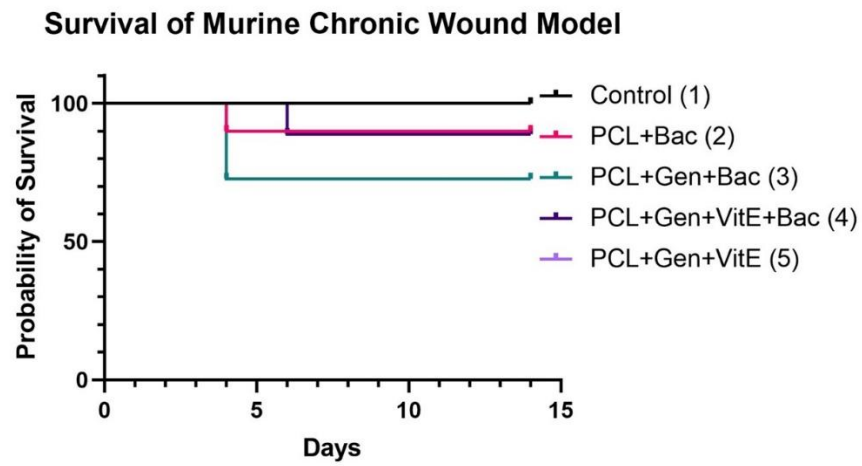

**Figure S1.** Survival of murine chronic model in a 14-day in vivo experiment (% alive animals).

Supplement: s1 [file s1]
